# Supplementary material for: Synthesis of high-molecular weight block copolymers of norbornene and propylene with methyl methacrylate initiated by a fluorenylamido titanium complex
Source: Royal Society of Chemistry journal article supplement (doi:10.1039/c3py00400g), 2013-01-01
Supplement: c3py00400g.pdf [file c3py00400g.pdf]

## Supporting Information

# Synthesis of high-molecular weight block copolymers of norbornene and propylene with methyl methacrylate initiated by fluorenylamido titanium complex

*Ryo Tanaka, Yuushou Nakayama and Takeshi Shiono\**

### Table of Contents

|                                                              |     |
|--------------------------------------------------------------|-----|
| GPC traces of the obtained block copolymers                  | 2   |
| <sup>1</sup> H NMR spectrum of the obtained block copolymers | 3-4 |
| TG charts of the obtained block copolymers                   | 5-6 |
| DSC chart of PP-PMMA block before annealing                  | 7   |

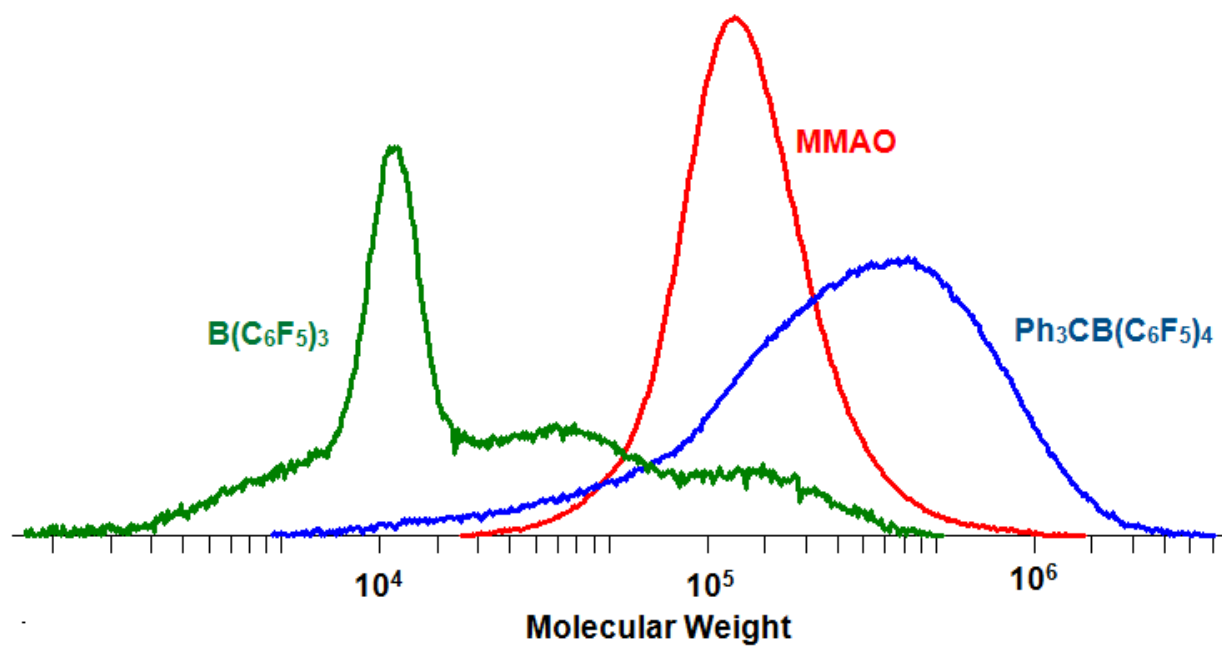

**Figure S1.** GPC traces of propylene-MMA block copolymers (Table 1: red, run 1; blue, run 2; green, run 3).

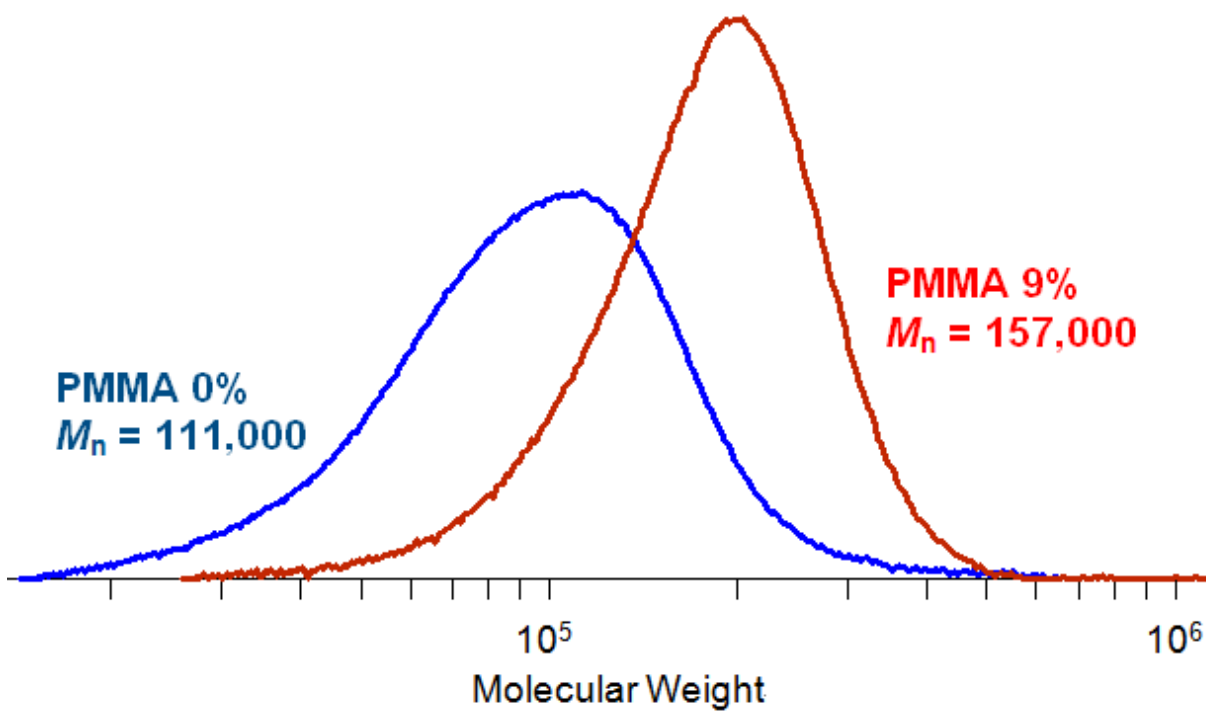

**Figure S2.** GPC traces of propylene-MMA block copolymer and prepolymer (Table 2: blue, run 1; red, run 2).

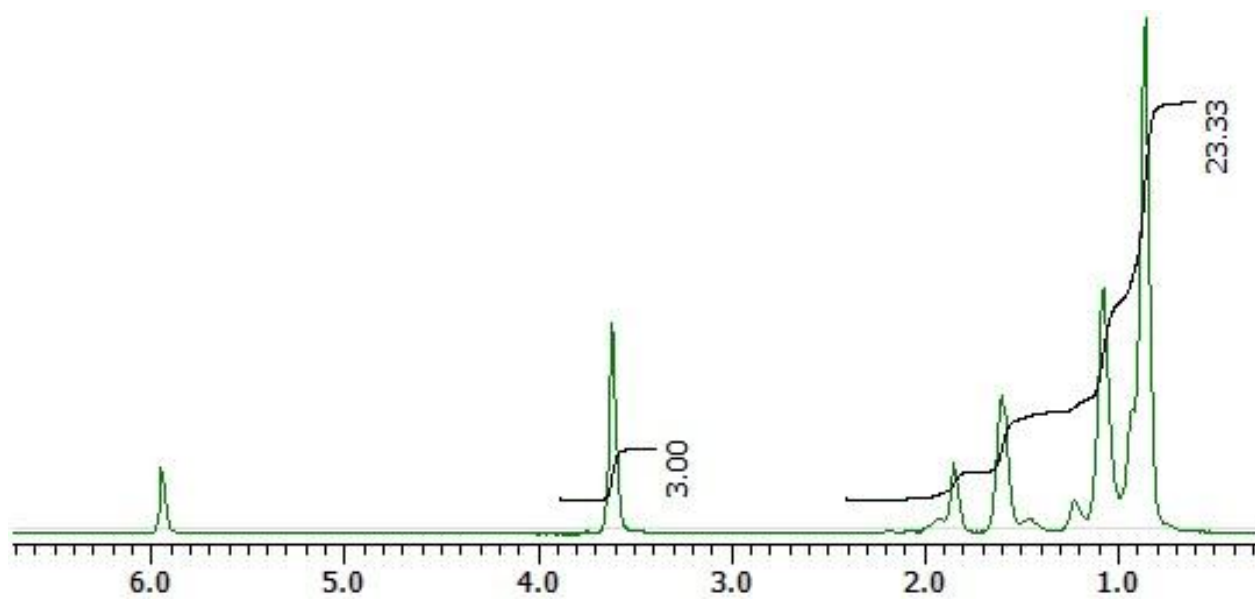

**Figure S3.** <sup>1</sup>H NMR spectrum of propylene–MMA block copolymer (Table 2, run 4). 25 mol% of MMA was introduced.

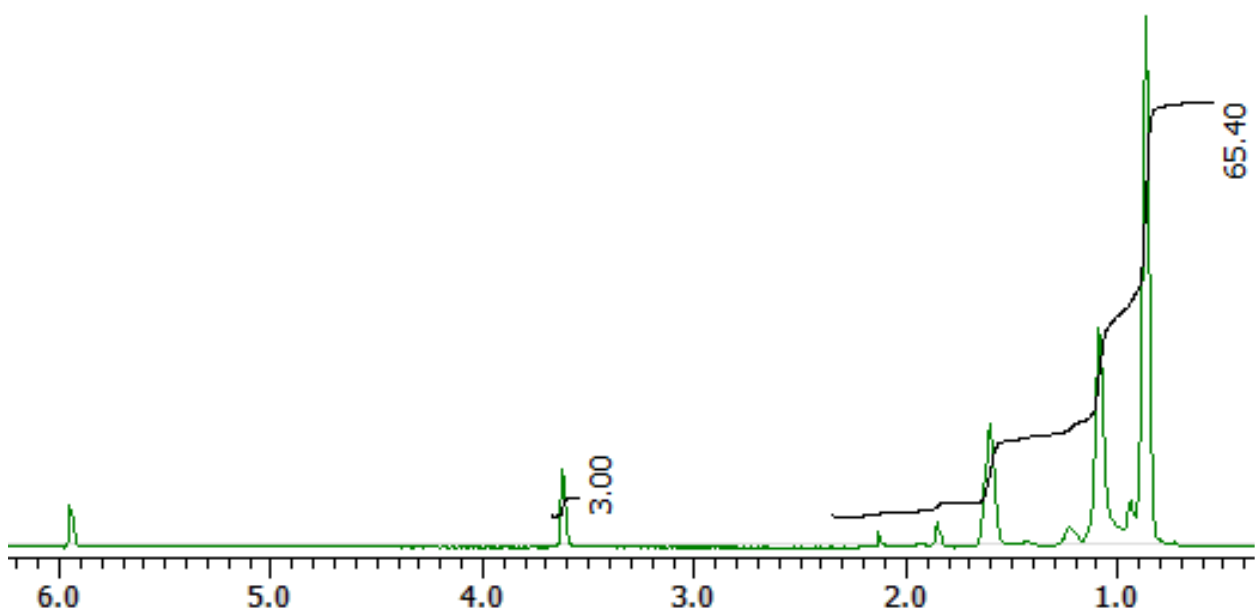

**Figure S4.** <sup>1</sup>H NMR spectrum of propylene–MMA block copolymer (Table 2, run 2). 9 mol% of MMA was introduced.

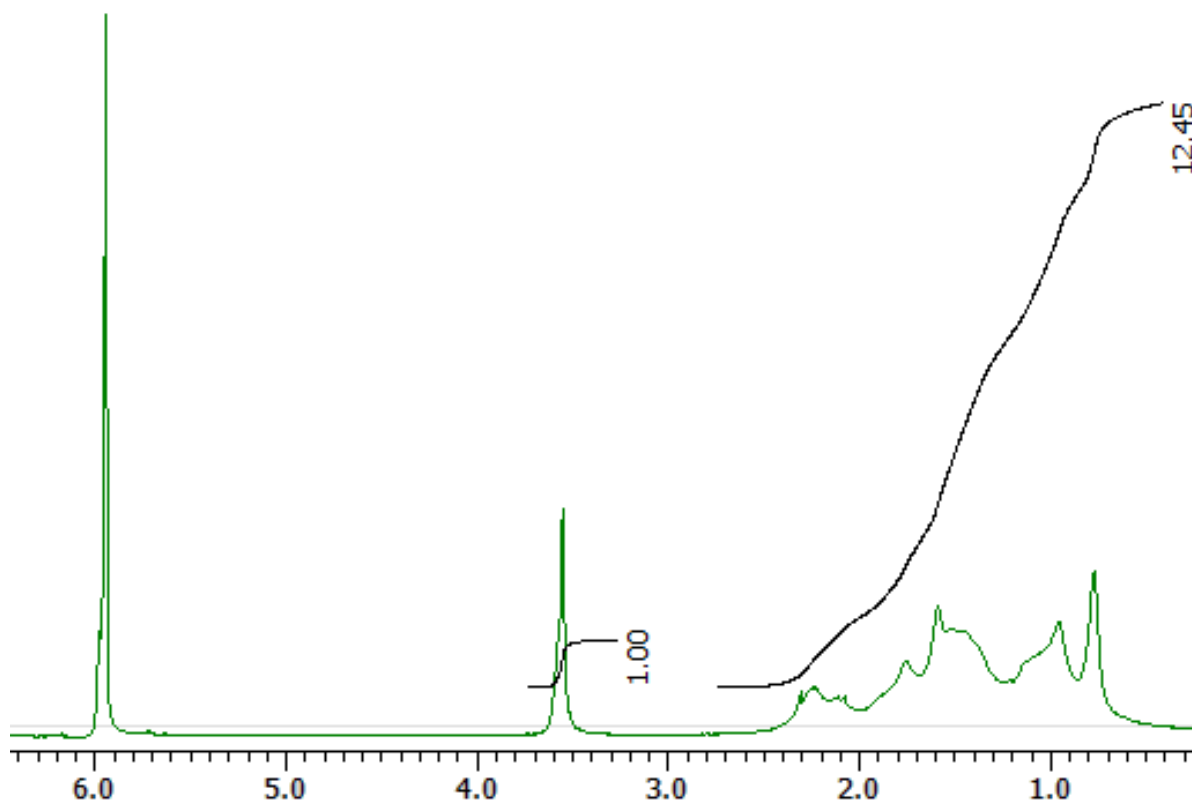

**Figure S5.** <sup>1</sup>H NMR spectrum of norbornene–propylene–MMA block copolymer (Table 4, run 2). 23 mol% of MMA was introduced.

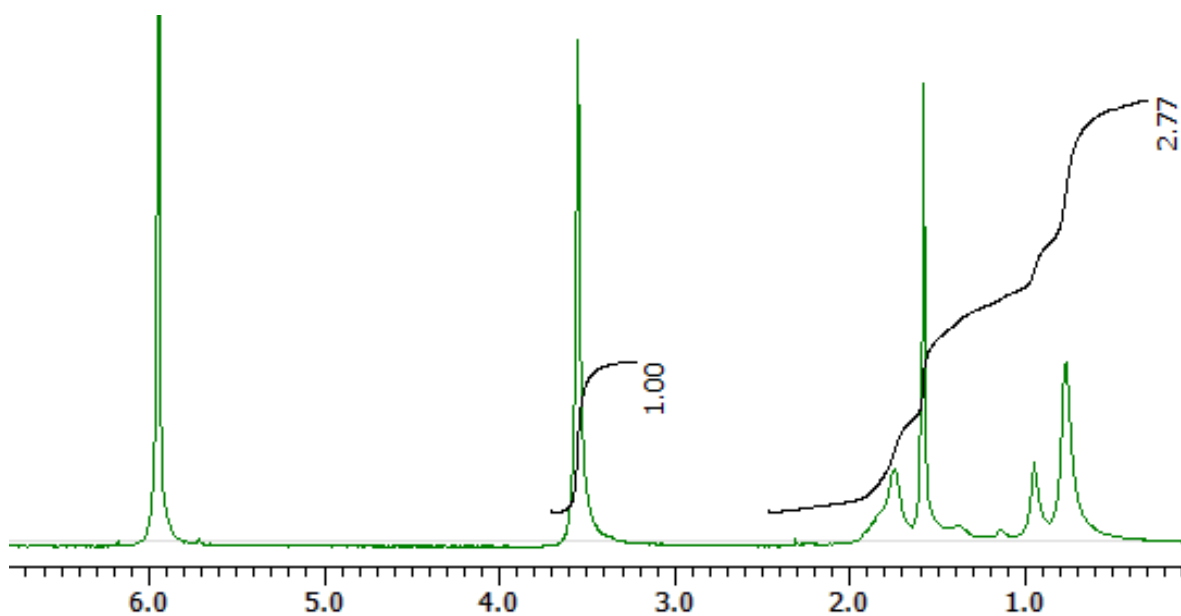

**Figure S6.** <sup>1</sup>H NMR spectrum of norbornene–propylene–MMA block copolymer (Table 4, run 3). 74 mol% of MMA was introduced.

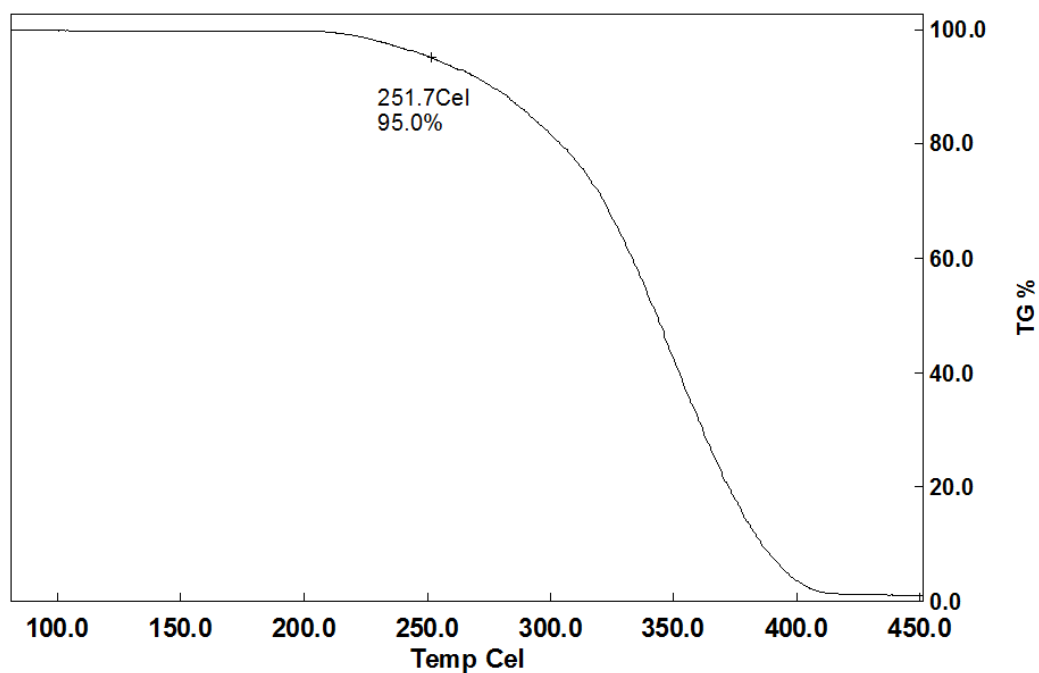

**Figure S7.** TG data of propylene-MMA block copolymer (25 mol% PMMA, Table 2, run 4). 5% degradation

temperature was 252 °C.

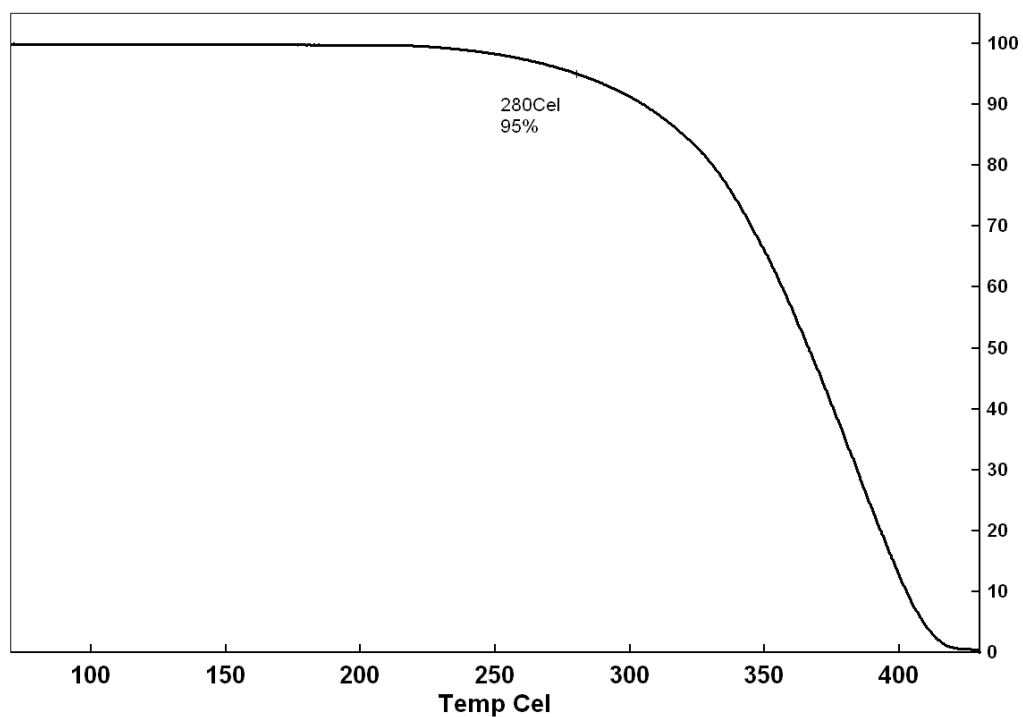

**Figure S8.** TG data of propylene-MMA block copolymer (9 mol% PMMA, Table 2, run 2). 5% degradation

temperature was 280 °C.

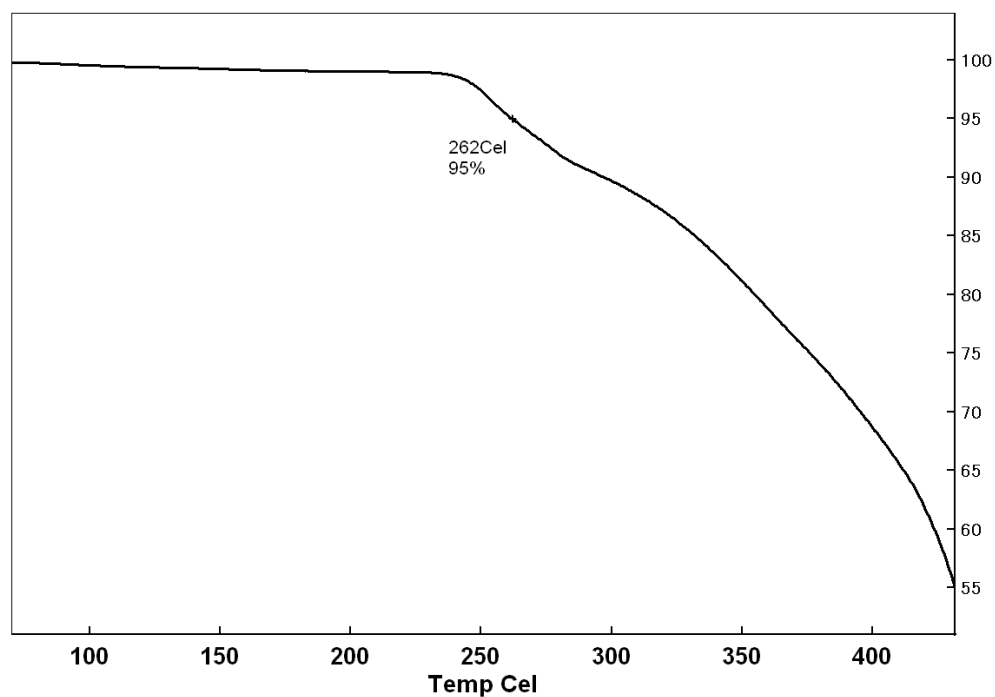

**Figure S9.** TG data of norbornene-propylene-MMA block copolymer (23 mol% PMMA, Table 4, run 2). 5%

degradation temperature was 262 °C.

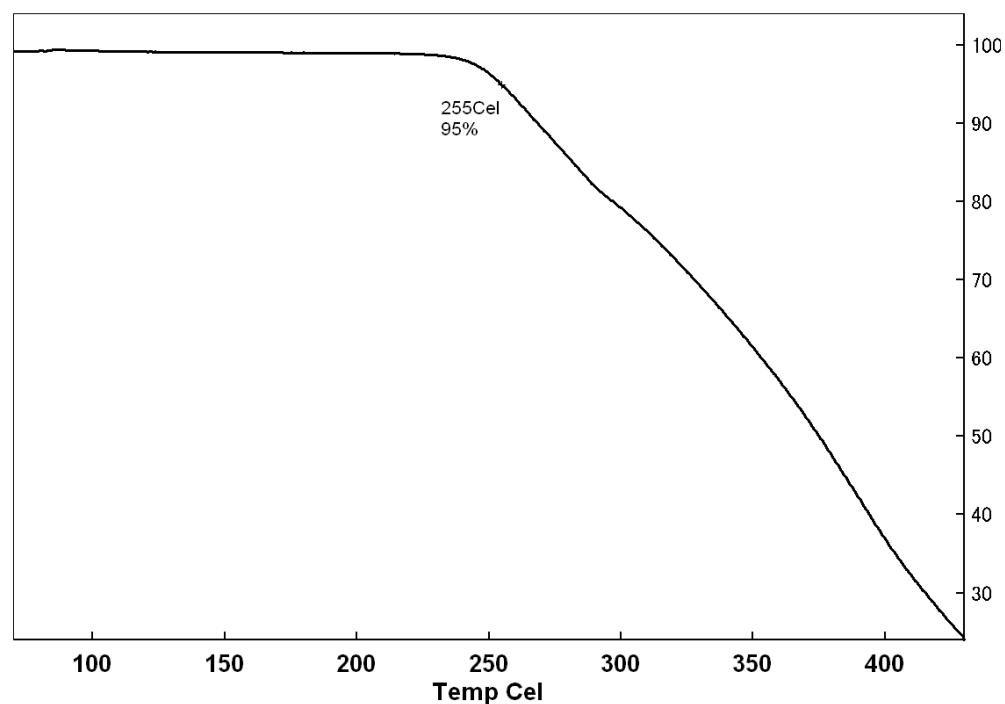

**Figure S10.** TG data of norbornene-propylene-MMA block copolymer (74 mol% PMMA, Table 4, run 3). 5%

degradation temperature was 255°C.

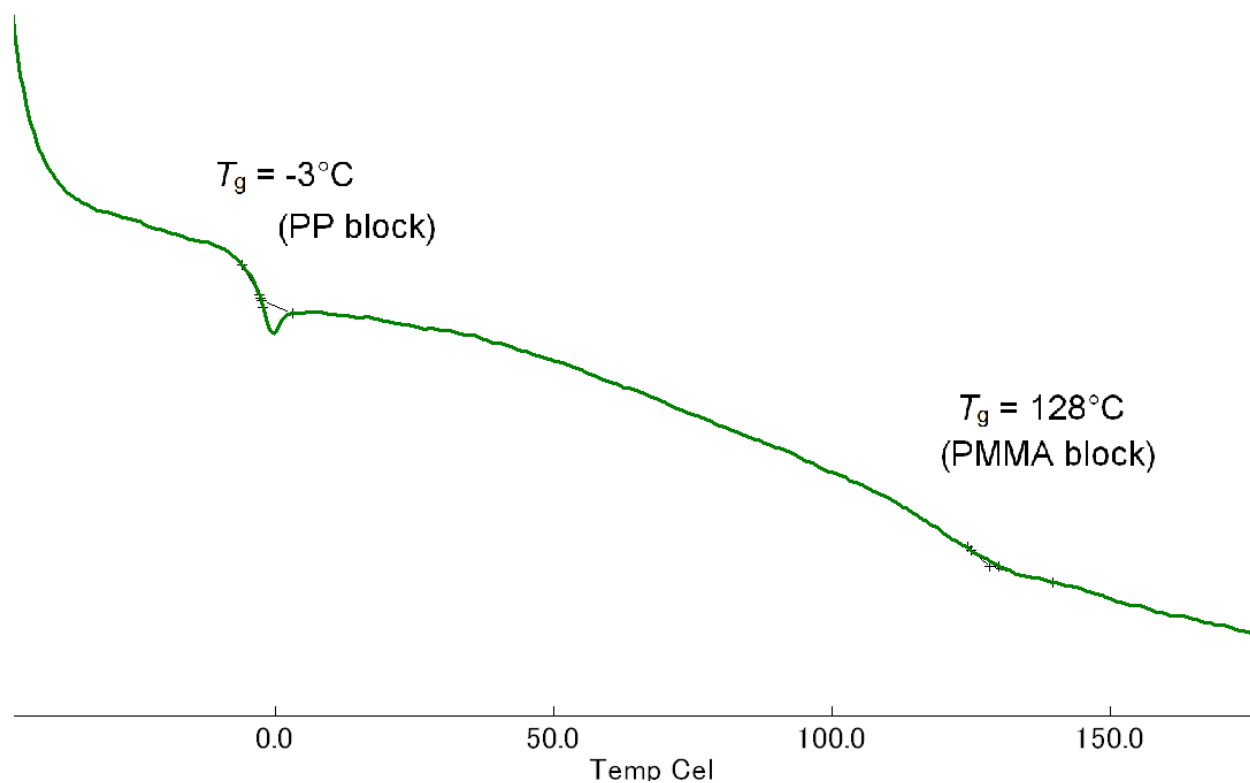

**Figure S11.** DSC chart of propylene–MMA block copolymer (25 mol% PMMA, Table 2, run 3) without annealing.  $T_m$  of the PP block (88°C), which was observed after annealing, was not observed. Lower  $T_g$  value (98°C) was observed after annealing, indicating that mixed phase of *syn*-PP and *syn*-PMMA was formed.
